# Supplementary material for: Fucoidan-coated CuS nanoparticles for chemo-and photothermal therapy against cancer
Source: PubMed Central journal article supplement (PMC5849162; doi:10.18632/oncotarget.23898), 2018-01-03
Supplement: oncotarget-09-12649-s001.pdf [file oncotarget-09-12649-s001.pdf]

# Fucoidan-coated CuS nanoparticles for chemo- and photothermal therapy against cancer

## SUPPLEMENTARY MATERIALS

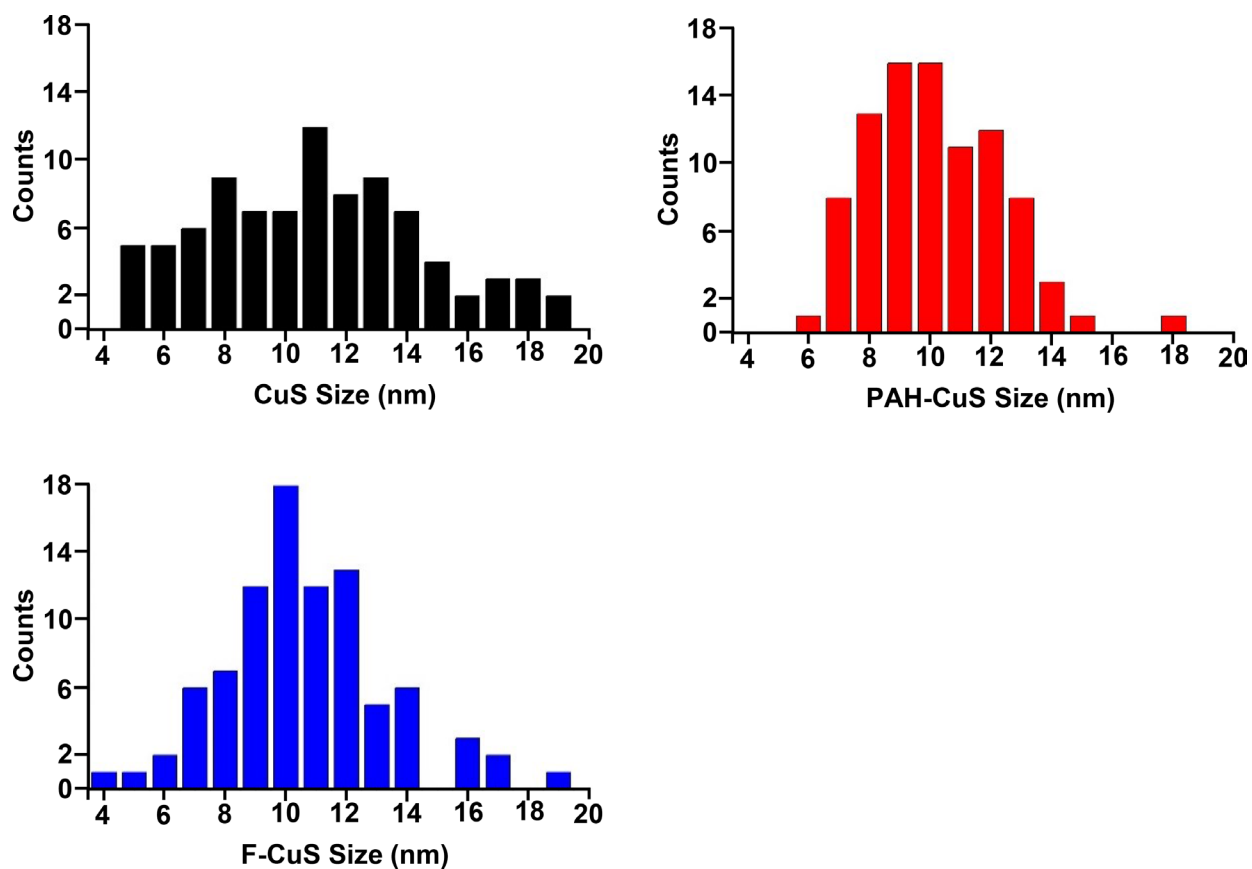

Supplementary Figure 1: TEM corresponding size distribution histogram of each coated nanoparticles: CuS (black), PAH-CuS (red), F-CuS (blue).

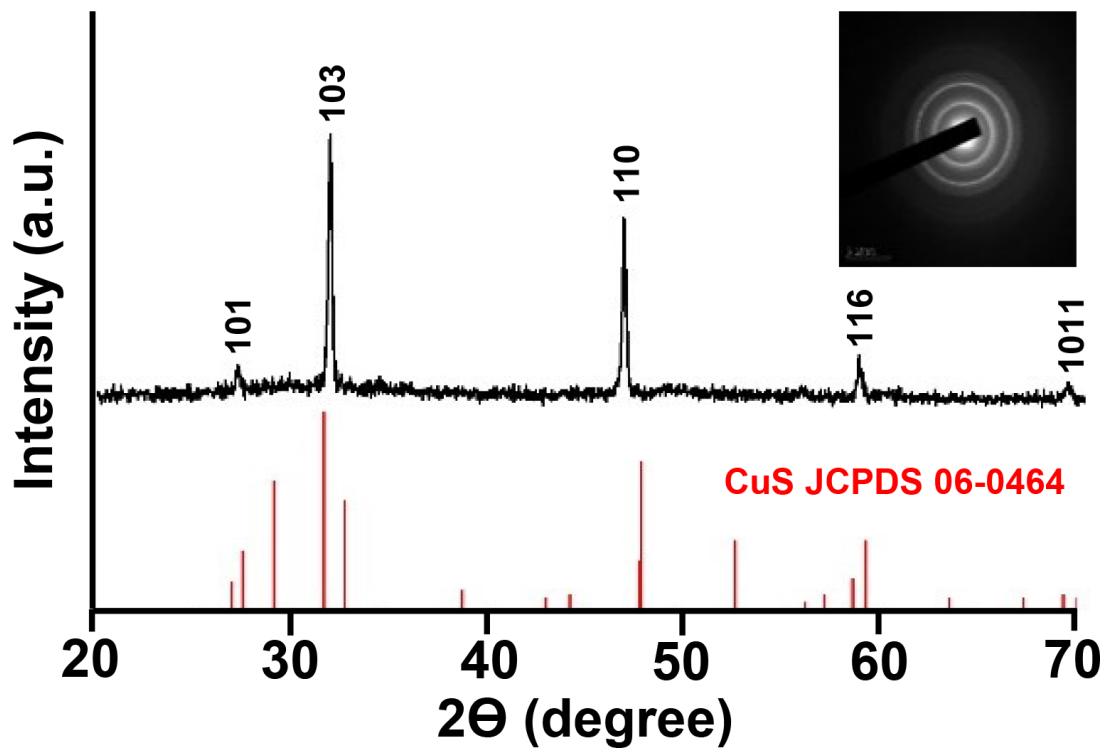

Supplementary Figure 2: XRD pattern and ED pattern(inset) of CuS with the standard JCPDS card 06-0464 of CuS.

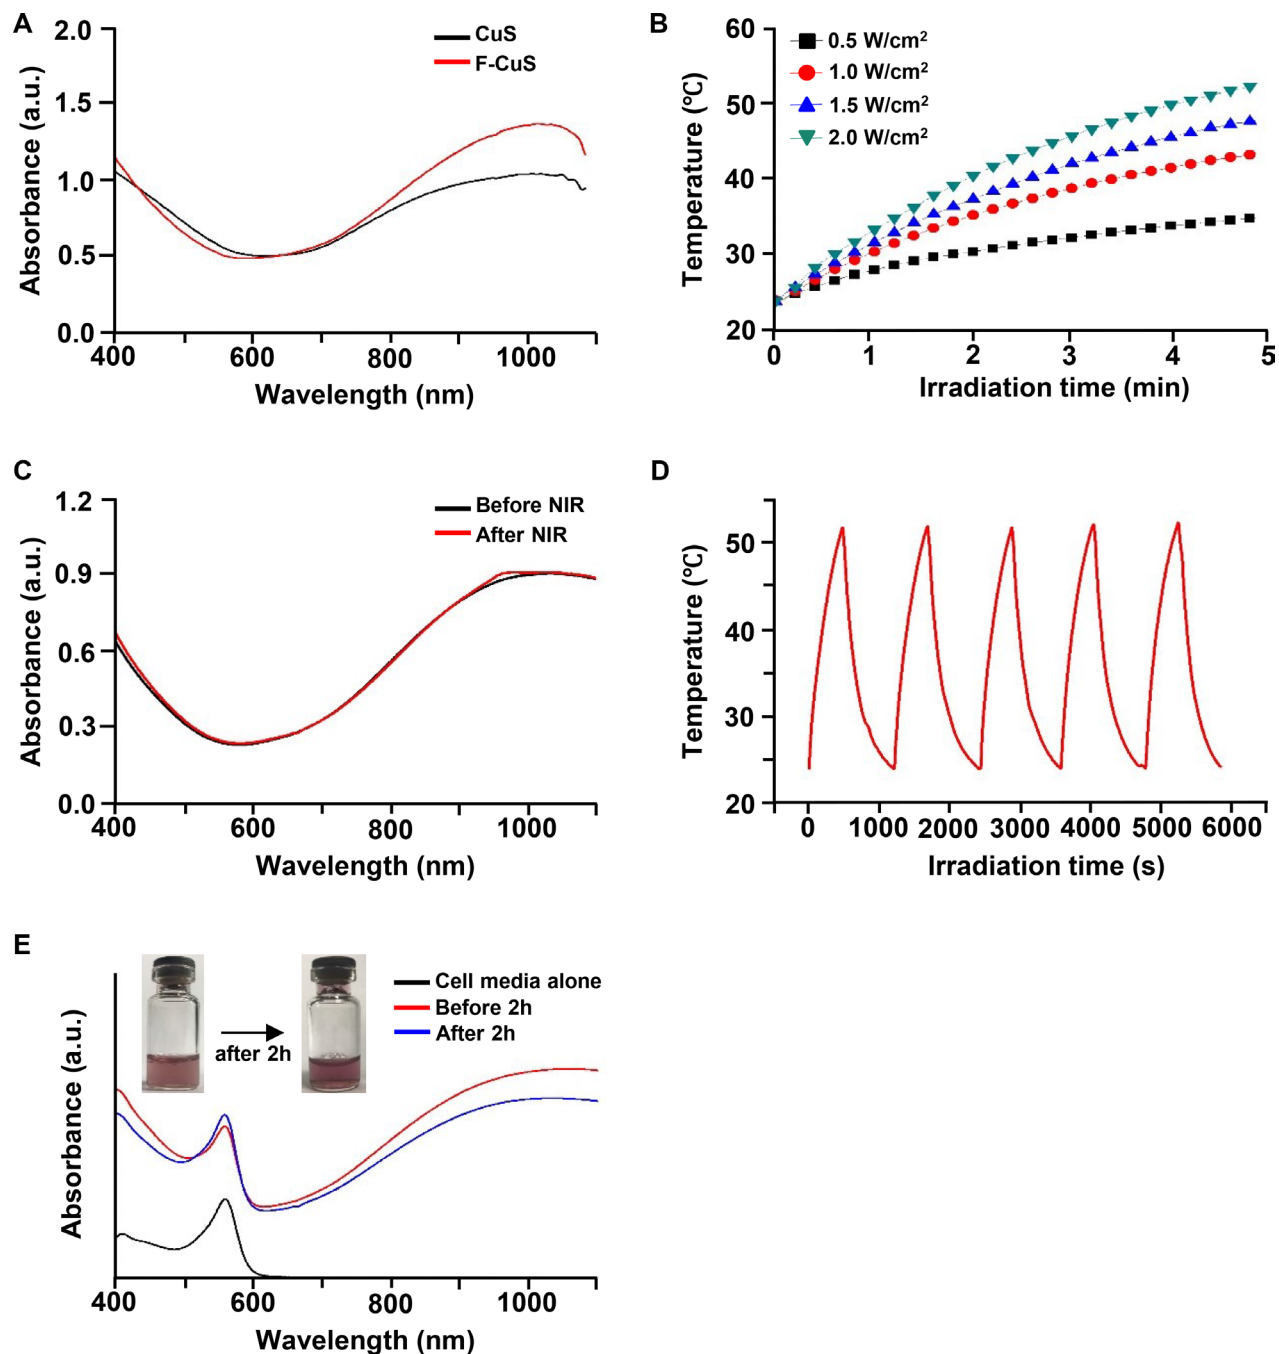

**Supplementary Figure 3:** (A) UV-vis absorption of CuS (black) and F-CuS (red). (B) Photothermal heating curves of F-CuS (50 µg/ml) dissolved in water, irradiated for 5 min with an 808 nm laser with indicated power density. (C) UV-vis absorption of F-CuS before (black) and after (red) NIR-irradiation. (D) Photothermal heating curves of F-CuS (50 µg/mL) during the successful 5 cycles of the laser ON/OFF mode (808 nm laser, 2W/cm<sup>2</sup>). (E) UV-vis absorption of F-CuS dissolved in cell media before and after 2 h.

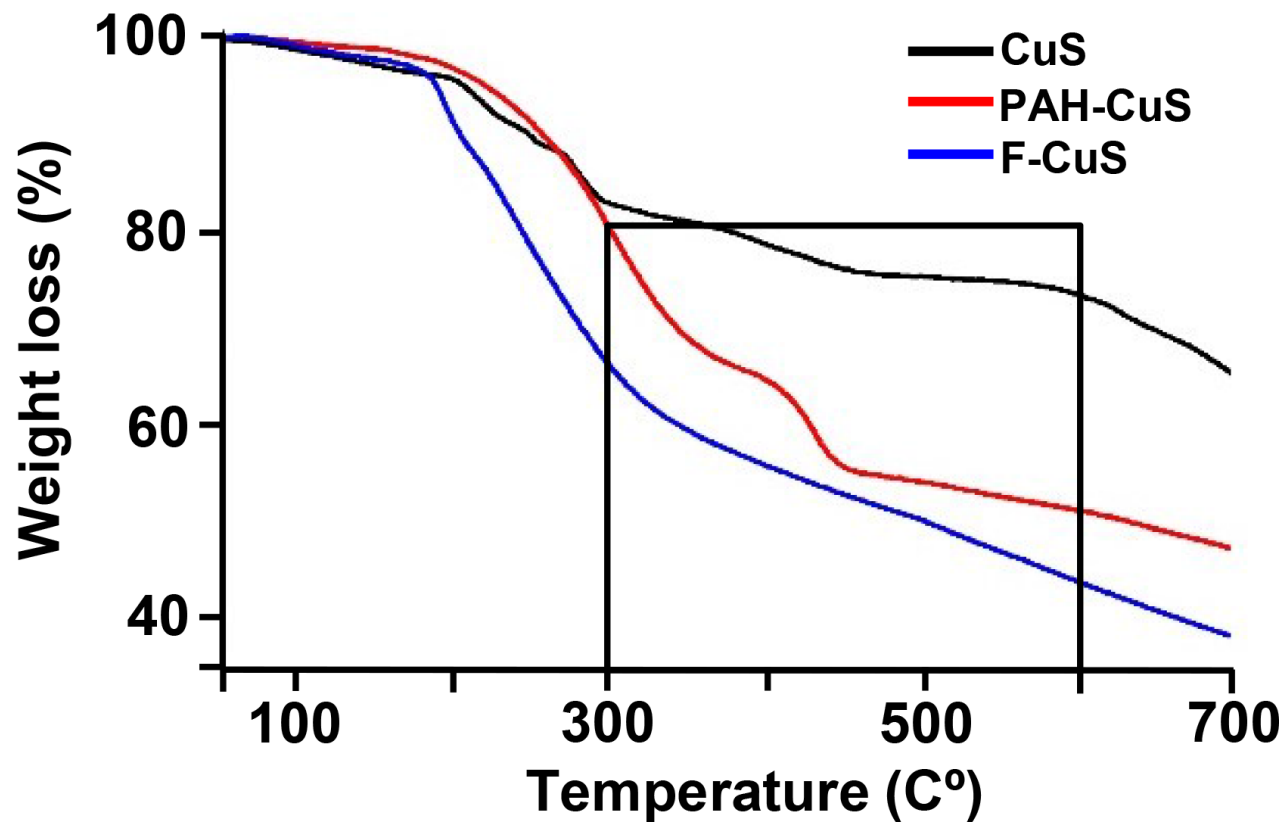

Supplementary Figure 4: TGA curves of each coated nanoparticles: CuS (black), PAH-CuS (red), F-CuS (blue).

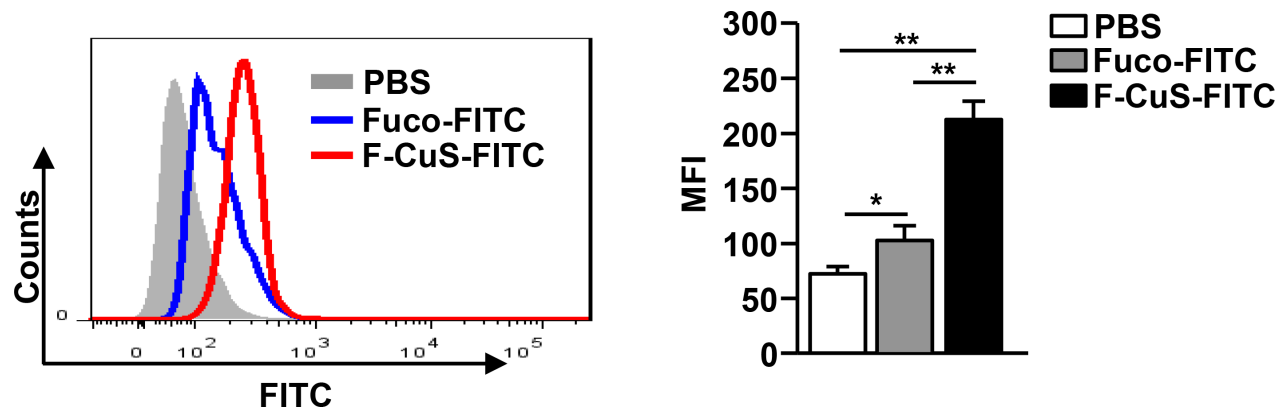

**Supplementary Figure 5: Intracellular uptake of fucoidan in HeLa cells by F-CuS.** HeLa cells ( $2 \times 10^5$ ) were incubated with fucoidan-FITC (Fuco-FITC) and F-CuS-FITC for 2 h. The intracellular uptake of fucoidan was analyzed on a flow cytometry (left panel). Mean fluorescence intensity (MFI) of FITC positive cells was shown (right panel), \* $p < 0.05$ , \*\* $p < 0.01$ . Data are representative of or the average of analyses of 6 independent samples (2 samples per experiment, 3 independent experiments).

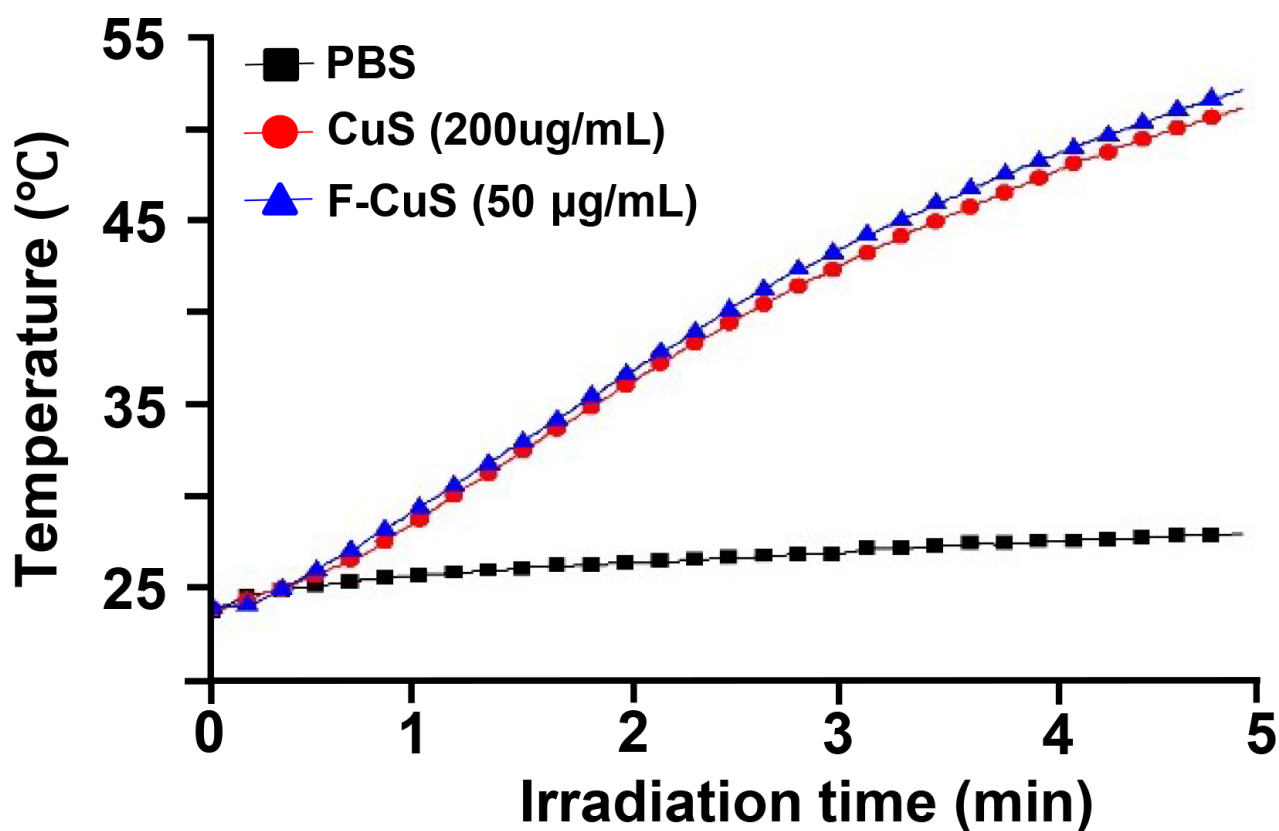

**Supplementary Figure 6: Photothermal heating curves of CuS (red) and F-CuS (blue) with different concentration dissolved in PBS irradiated using 808 nm laser with power density of 2 W/cm<sup>2</sup> for 5 min.**

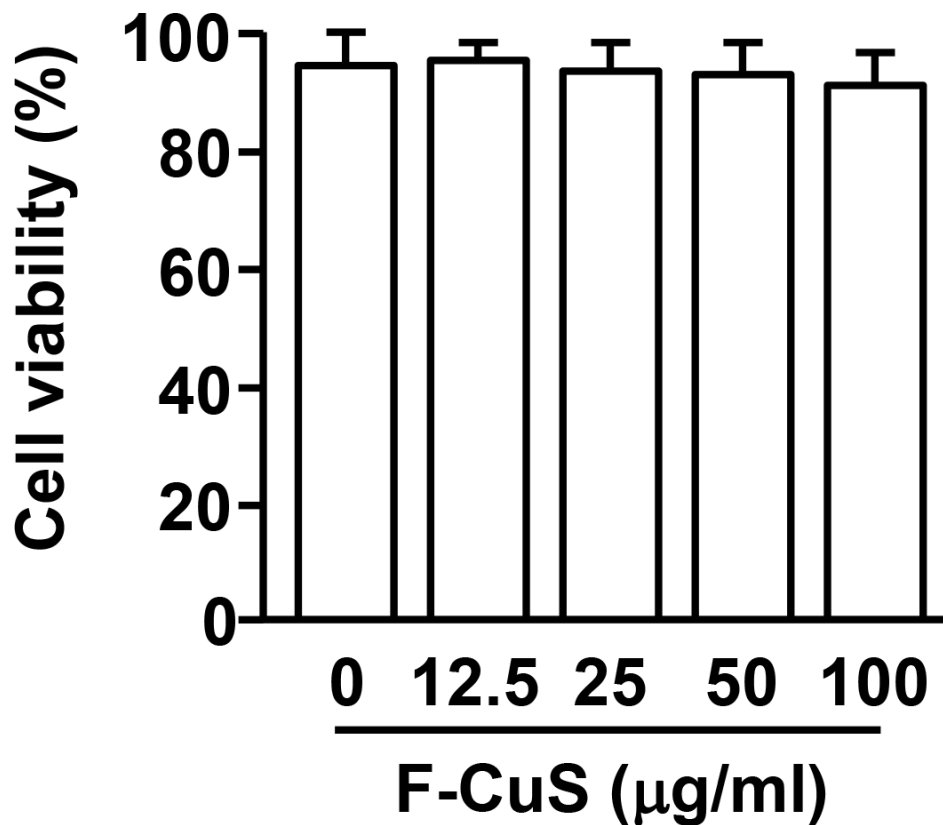

**Supplementary Figure 7:** RAW cells were treated with an indicated concentration of F-CuS for 24 h. Cell viability was analyzed by MTT assay.

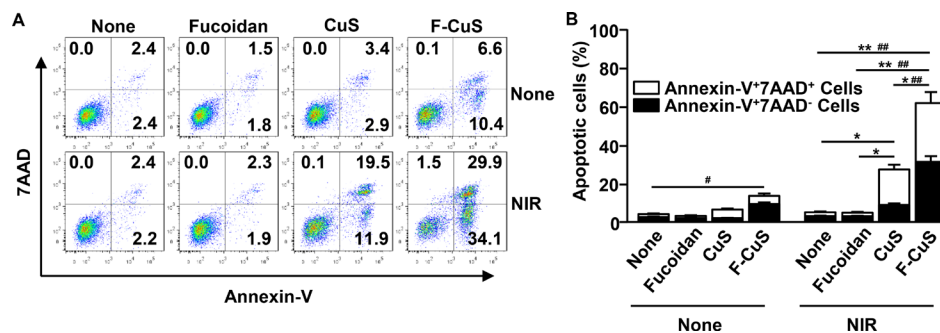

**Supplementary Figure 8: Apoptotic effect of F-CuS with laser irradiation against A549 cells.** A549 cells ( $2 \times 10^5$ ) were incubated with fucoidan, CuS and F-CuS-FITC and irradiated with 808 nm laser for 5 min. (A) Apoptosis of A549 cells were analyzed by annexin-V and 7AAD staining on a flow cytometry after 24 h of laser irradiation (left panel). (B) Mean percentage of early apoptotic cells (Annexin-V+7AAD<sup>-</sup> Cells) and late apoptotic/necrotic cells (Annexin-V+7AAD<sup>+</sup> Cells) were shown (right panel). # $p < 0.05$ , ## $p < 0.01$  early apoptotic cells, \* $p < 0.05$ , \*\* $p < 0.01$  late apoptotic/necrotic cells. Data are representative of or the average of analyses of 6 independent samples (2 samples per experiment, 3 independent experiments).

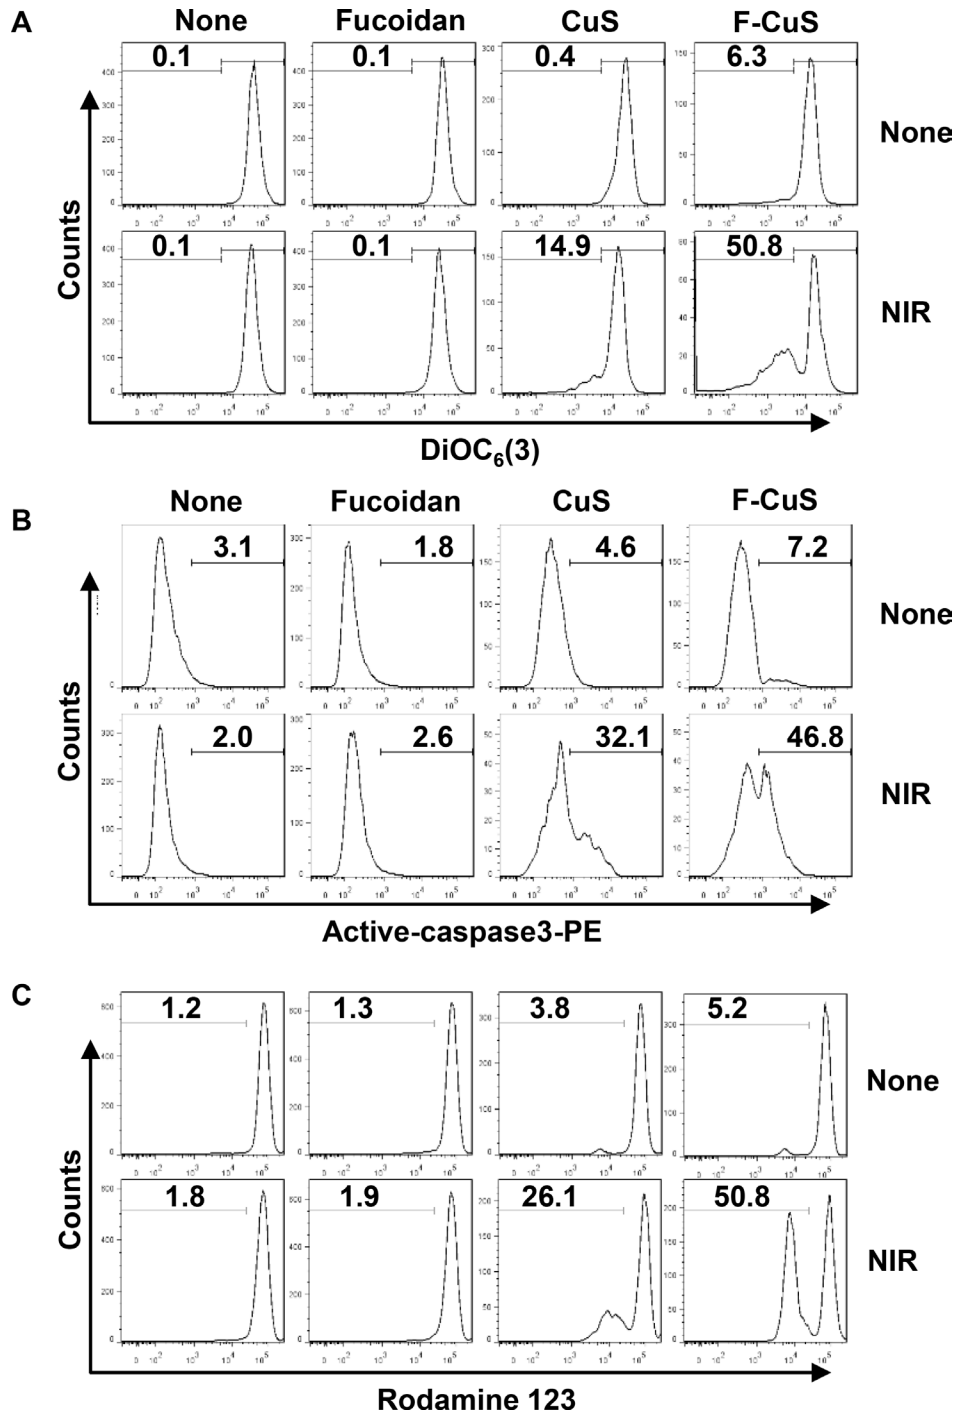

**Supplementary Figure 9: Mitochondria permeability and activation of caspase 3 by F-CuS.** HeLa cells ( $2 \times 10^5$ ) were incubated with fucoidan, CuS and F-CuS-FITC and irradiated with 808 nm laser for 5 min. (A) Mitochondria permeability was measured by DiOC<sub>6</sub>(3) reduction on a flow cytometry. (B) Activation of caspase 3 was analyzed by flow cytometry. (C) The mitochondrial membrane potential were measured by rodamine 123 staining. Data are representative of analyses of 6 independent samples (2 samples per experiment, 3 independent experiments).

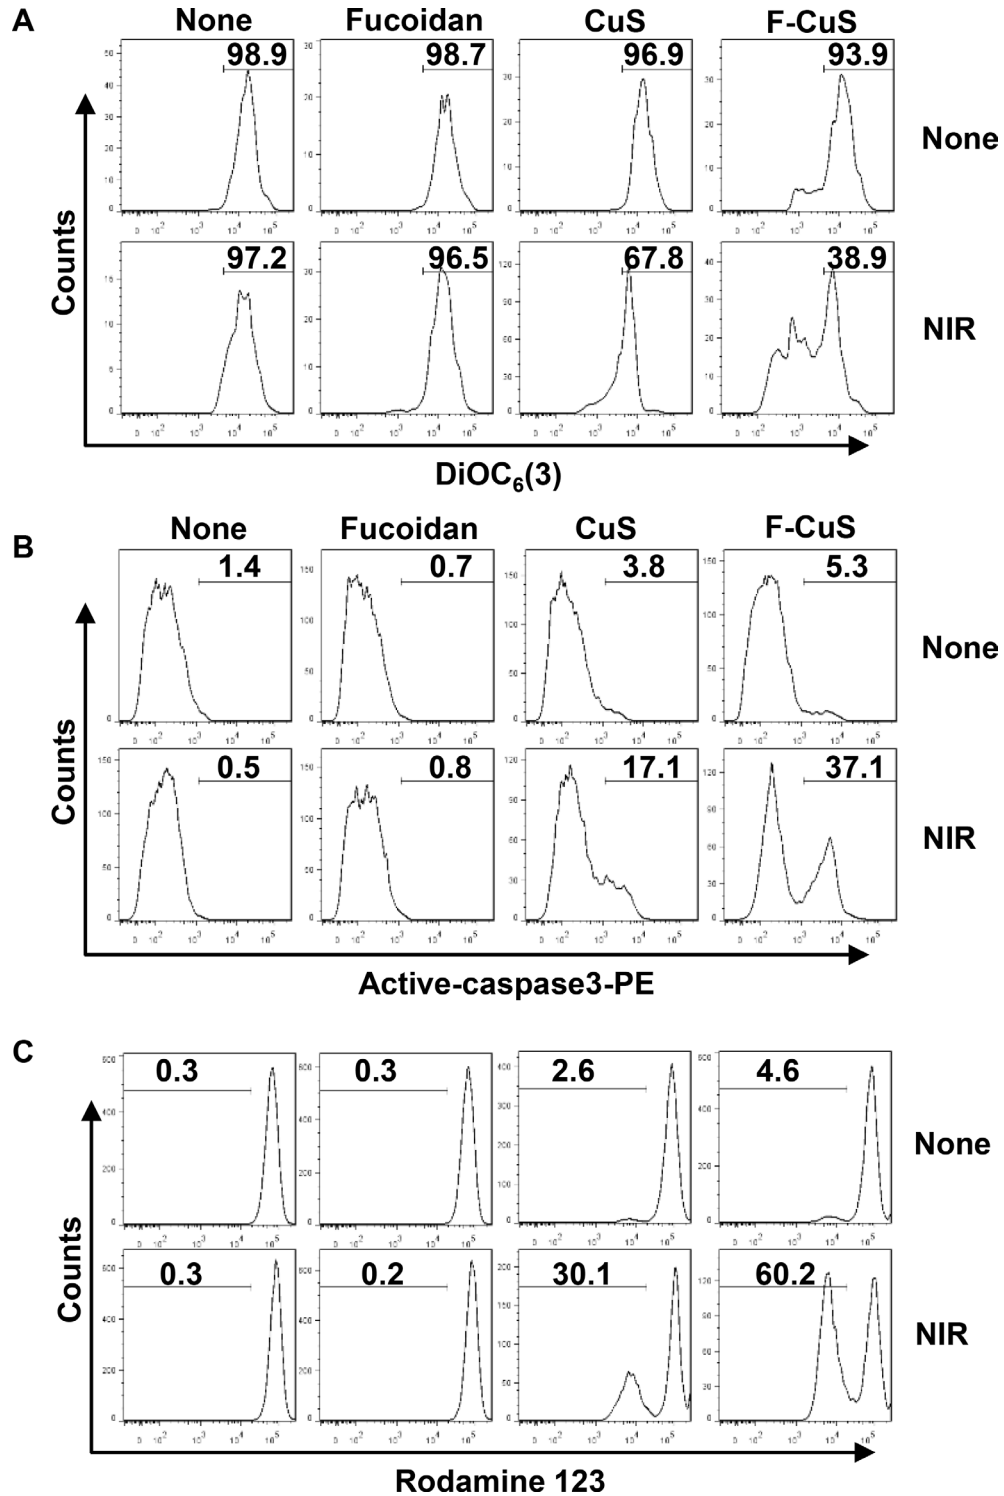

**Supplementary Figure 10: Mitochondria permeability and activation of caspase 3 by F-CuS.** A549 cells ( $2 \times 10^5$ ) were incubated with fucoidan, CuS and F-CuS-FITC and irradiated with 808 nm laser for 5 min. (A) Mitochondria permeability was measured by DiOC<sub>6</sub>(3) reduction on a flow cytometry. (B) Activation of caspase 3 was analyzed by flow cytometry. (C) The mitochondrial membrane potential were measured by rodamine 123 staining. Data are representative of analyses of 6 independent samples (2 samples per experiment, 3 independent experiments).



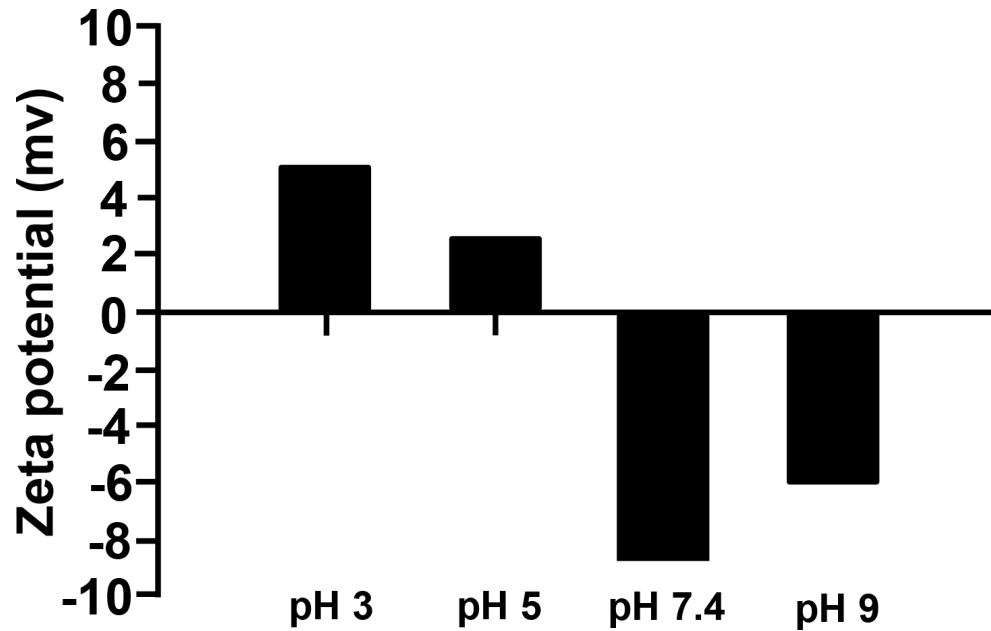

**Supplementary Figure 11: Release feature of fucoidan from NPs.** Zeta potential value of F-CuS changed from -8.23 (at pH 7.4) to 5.05 (at pH 3), 2.64 (at pH 5), and -5.92 (at pH 9) after 2 h exposure.

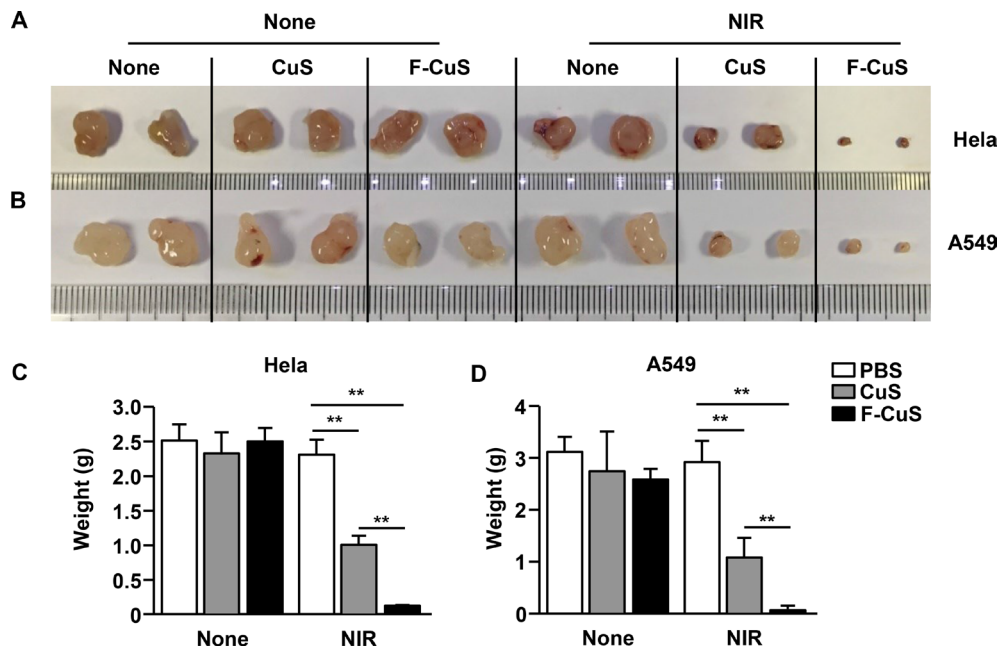

**Supplementary Figure 12: Therapeutic effect of F-CuS with laser irradiation against HeLa and A549 tumor.** Nude mice were injected s.c. with  $5 \times 10^6$  HeLa cells and  $5 \times 10^6$  A549 cells, respectively. Once tumors were measured  $\sim 5.0$  mm after 14 days, the mice were treated i.t. with 40  $\mu\text{g}/\text{kg}$  fucoidan, 10  $\text{mg}/\text{kg}$  CuS and 2.5  $\text{mg}/\text{kg}$  F-CuS. Two hours after treatment, the mice were irradiated by 808 nm laser at 2  $\text{W}/\text{cm}^2$  for 5 min. (A) HeLa and (B) A549 tumor mass were shown on day 35 of tumor cell injection. (C) HeLa and (D) A549 tumor weight were shown on day 35. Data are representative of analyses of 6 independent samples (2 mice per experiment, total 3 independent experiments).

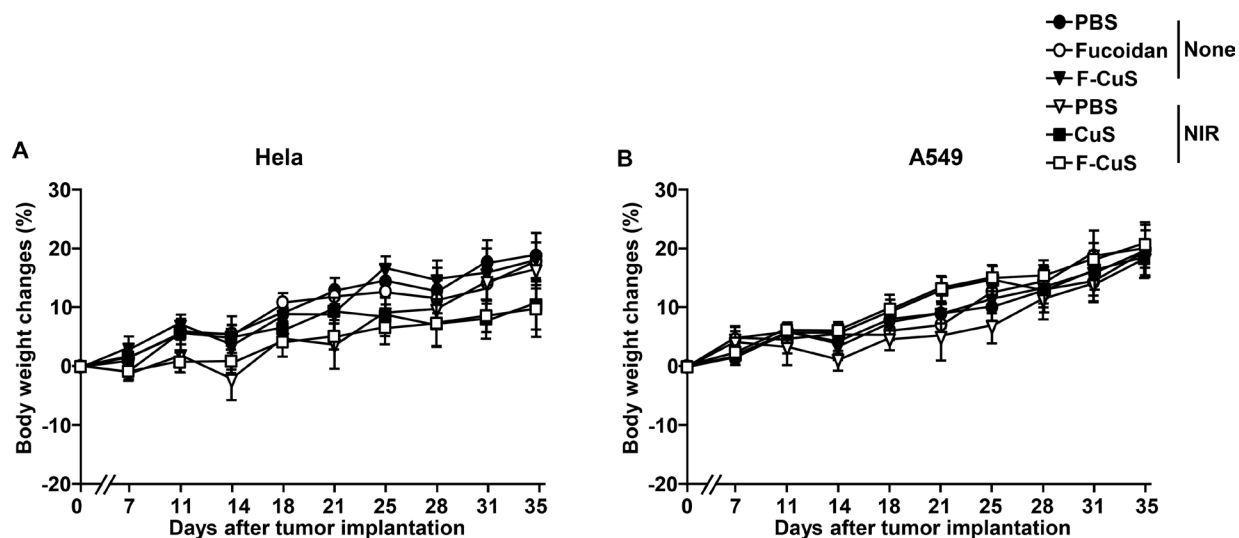

**Supplementary Figure 13: Changes of body weight during treatment of HeLa and A549 tumor by F-CuS.** Nude mice were injected s.c. with  $5 \times 10^6$  HeLa cells and  $5 \times 10^6$  A549 cells, respectively. Once tumors were measured  $\sim 5.0$  mm after 14 days, the mice were treated i.t. with 40  $\mu\text{g}/\text{kg}$  fucoidan, 10 mg/kg CuS and 2.5 mg/kg F-CuS. Two hours after treatment, the mice were irradiated by 808 nm laser at 2 W/cm<sup>2</sup> for 5 min. The body weight of (A) HeLa and (B) A549 tumor implanted mice were measured during treatment of the tumor. Data are a average of analyses of 6 independent samples (2 mice per experiment, total 3 independent experiments).

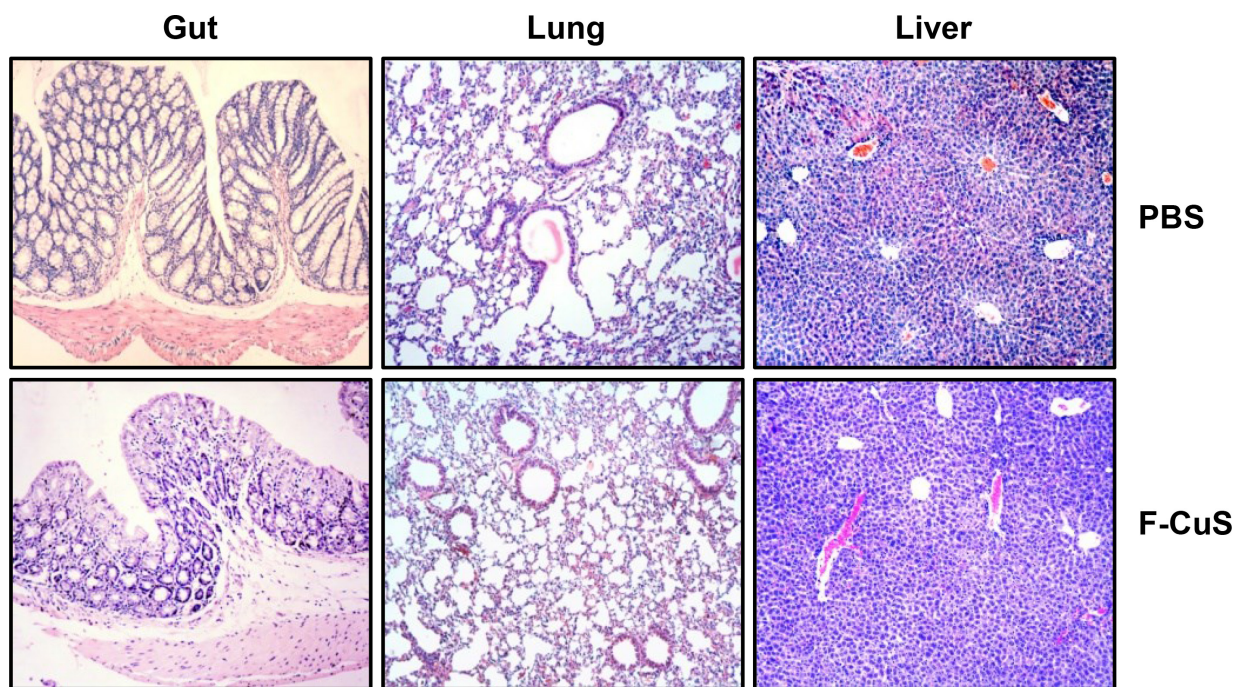

**Supplementary Figure 14: Histological analysis of peripheral tissue damage.** HeLa tumor-bearing nude mice were treated i.t. with F-CuS and irradiated by 808 nm laser at 2 W/cm<sup>2</sup> for 5 min. Twenty-one days after F-CuS treatment and laser irradiation, Gut, lung and liver were harvested and stained with haematoxylin and eosin (H&E). Data are representative of analyses of 6 independent samples (2 mice per experiment, total 3 independent experiments).

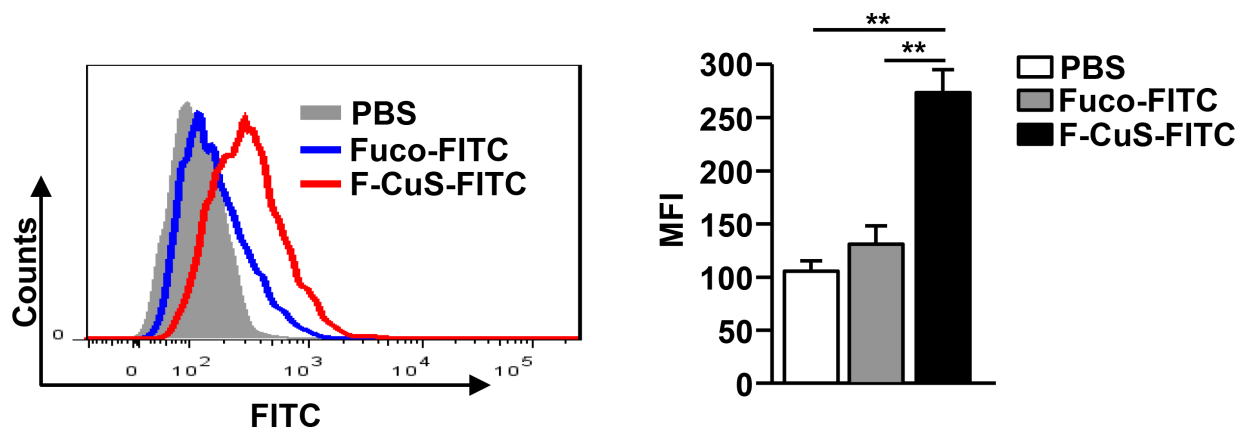

**Supplementary Figure 15: Intracellular uptake of fucoidan in K562 cells by F-CuS.** K562 cells ( $2 \times 10^5$ ) were incubated with fucoidan-FITC (Fuco-FITC) and F-CuS-FITC for 2 h. The intracellular uptake of fucoidan was analyzed on a flow cytometry (left panel). Mean fluorescence intensity (MFI) of FITC positive cells was shown (right panel),  $**p < 0.01$ . Data are representative of or the average of analyses of 6 independent samples (2 samples per experiment, 3 independent experiments).

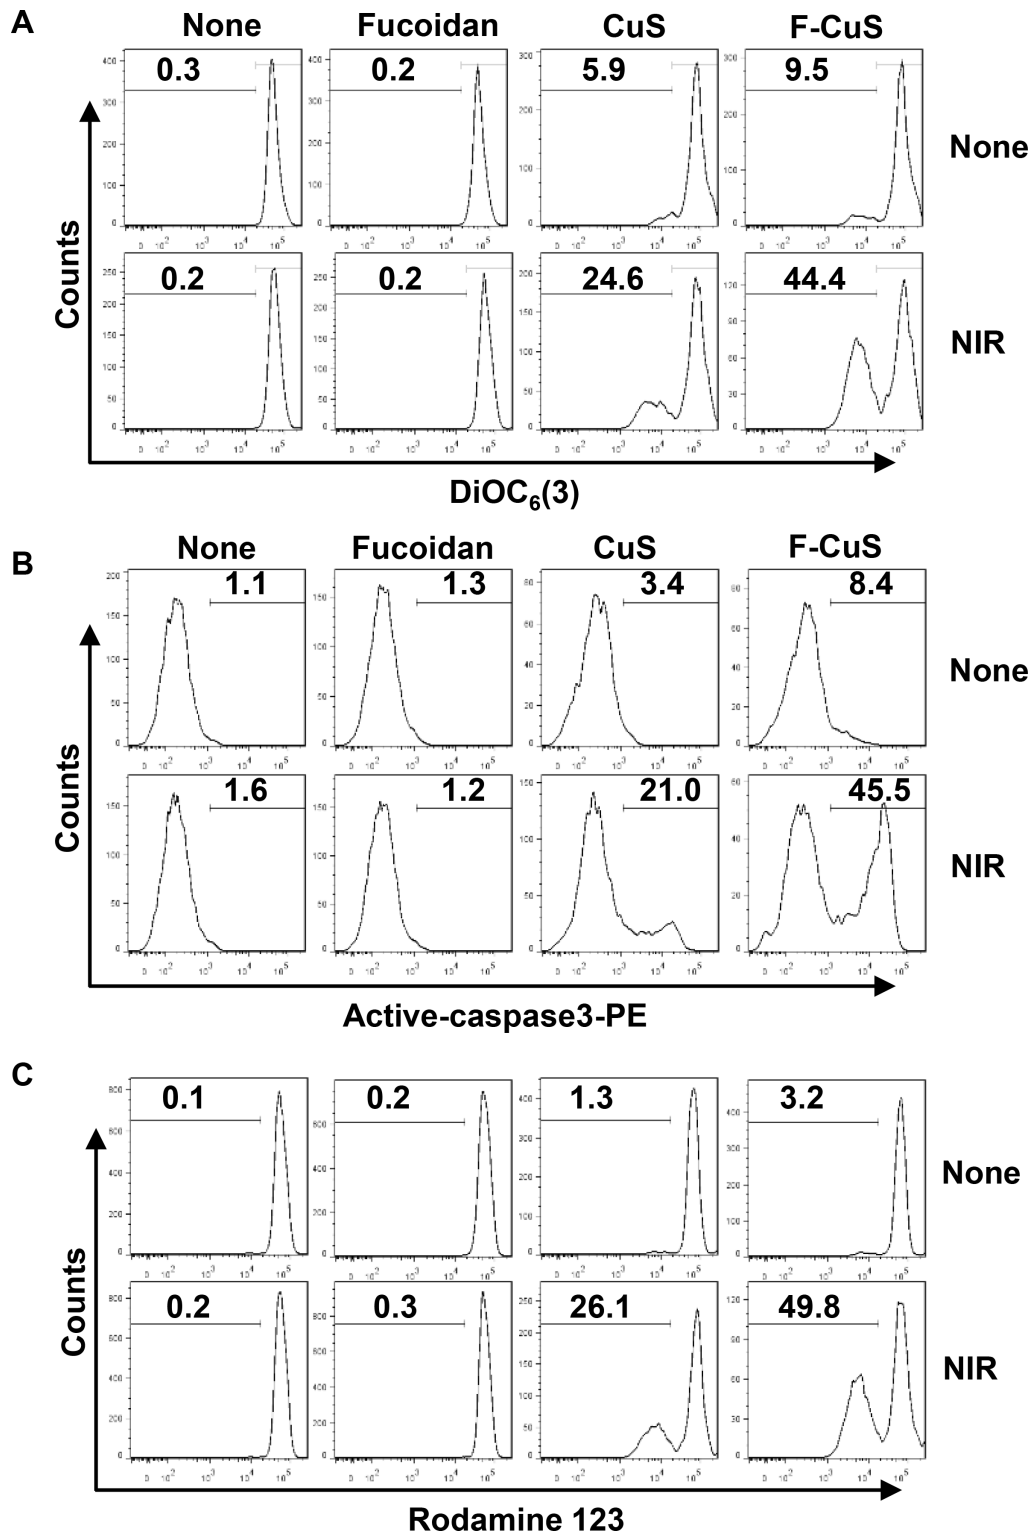

**Supplementary Figure 16: Mitochondria permeability and activation of caspase 3 by F-CuS.** K562 cells ( $2 \times 10^5$ ) were incubated with fucoidan, CuS and F-CuS-FITC and irradiated with 808 nm laser for 5 min. (A) Mitochondria permeability was measured by DiOC<sub>6</sub>(3) reduction on a flow cytometry. (B) Activation of caspase 3 was analyzed by flow cytometry. (C) The mitochondrial membrane potential were measured by rodamine 123 staining. Data are representative of analyses of 6 independent samples (2 samples per experiment, 3 independent experiments).

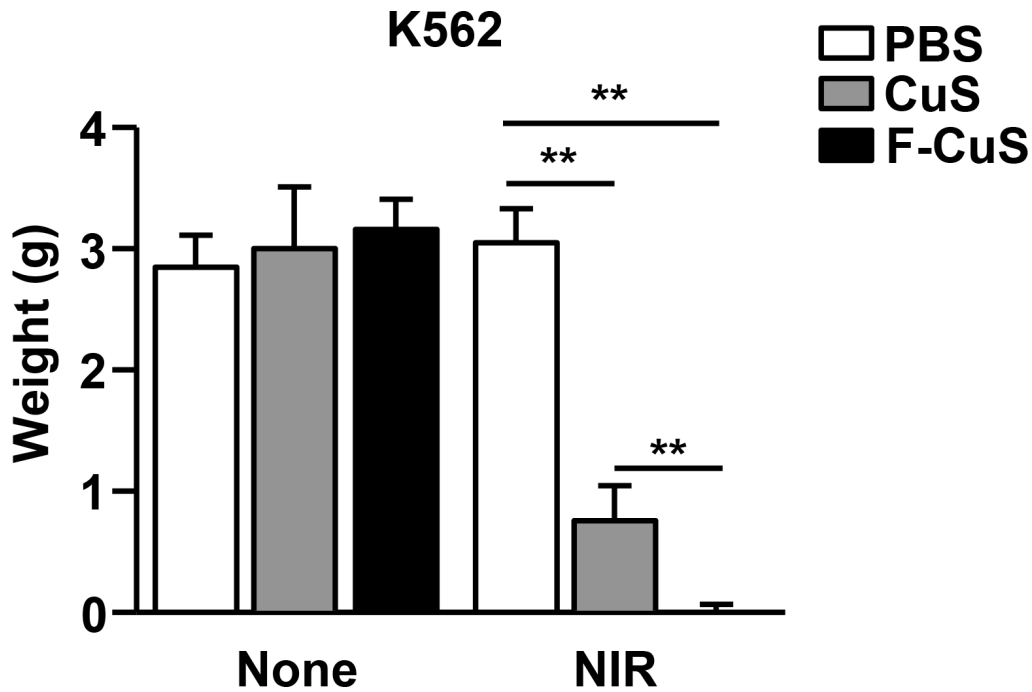

**Supplementary Figure 17:** Nude mice were injected s.c. with  $5 \times 10^6$  K562 cells and treated F-CuS with or without laser irradiation as described in Figure 5C. Weight of K562 tumor mass was shown on day 35. Data are representative of analyses of 6 independent samples (2 mice per experiment, total 3 independent experiments).

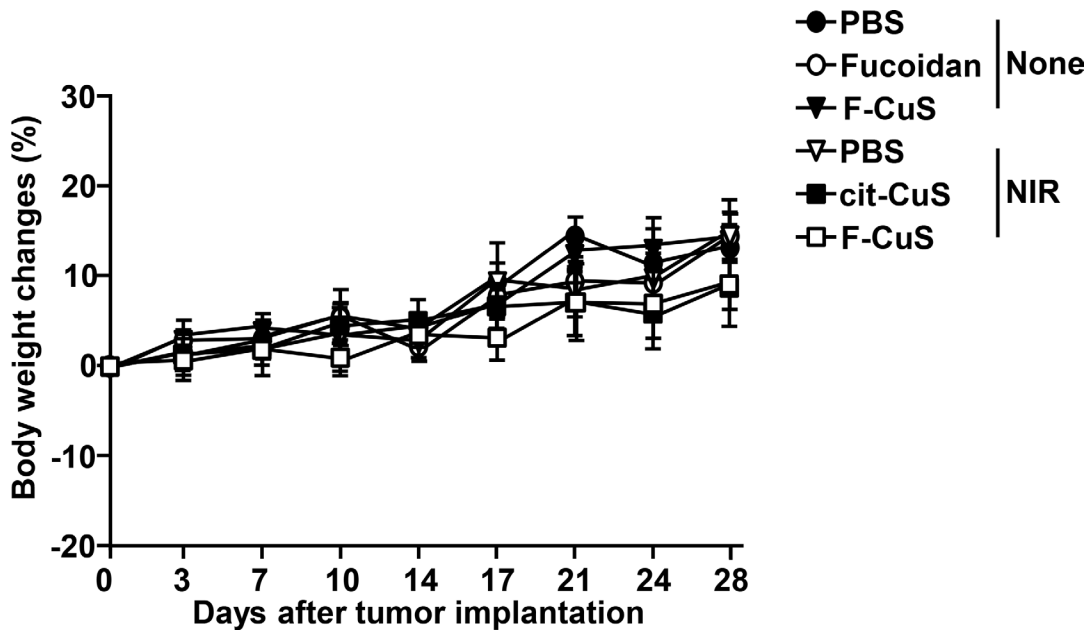

**Supplementary Figure 18:** Changes of body weight during treatment of K562 tumor by F-CuS. Nude mice were injected s.c. with  $5 \times 10^6$  K562 cells. Fourteen days after tumor injection, the mice were treated i.t. with 40  $\mu$ g/kg fucoidan, 10 mg/kg CuS and 2.5 mg/kg F-CuS. Two hours after treatment, the mice were irradiated by 808 nm laser at 2.5 W/cm<sup>2</sup> for 5 min. The body weight of the mice were monitored during treatment of the tumor. Data are a average of analyses of 6 independent samples (2 mice per experiment, total 3 independent experiments).
